# Supplementary material for: Room temperature synthesis and pressure-induced optical properties of lead-free 2D Cs3Bi2I6Cl3 perovskite nanocrystals
Source: Royal Society of Chemistry journal article supplement (doi:10.1039/d3ta02334f), 2023-01-01
Supplement: d3ta02334f1.pdf [file d3ta02334f1.pdf]

## Supporting Information

### Room Temperature Synthesis and Pressure-Induced Optical Properties of Lead-Free 2D Cs<sub>3</sub>Bi<sub>2</sub>I<sub>6</sub>Cl<sub>3</sub> Perovskite Nanocrystals

Jie Zhang,\* Mingxing Li, Dehua Wang, Binhua Chu, Shufang Zhang, Qinfeng Xu, and Kai Wang\*

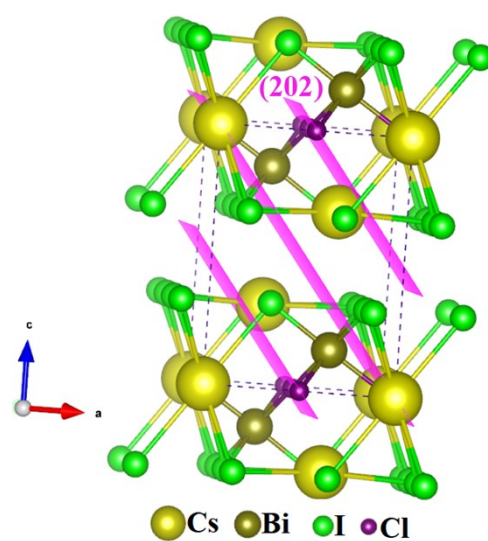

**Figure S1.** The solved crystal structure of  $\text{Cs}_3\text{Bi}_2\text{I}_6\text{Cl}_3$  viewed from the b-axis upwards under ambient conditions, intuitively showing the crystal planes of (202).

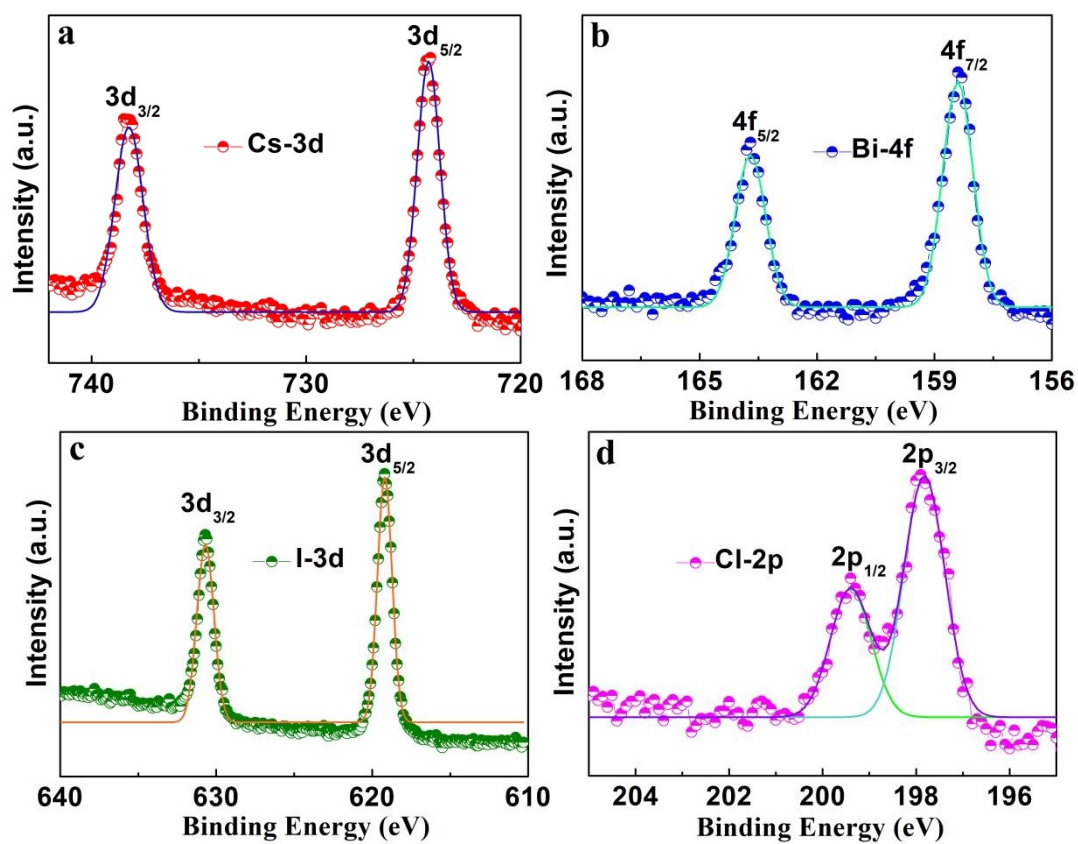

**Figure S2.** High-resolution XPS spectra and peak fitting for: (a)  $\text{Cs}^+$ , the peaks at 738.5 and 724.2 eV correspond to the 3d doublet of  $\text{Cs}^+$ , (b)  $\text{Bi}^{3+}$ , the peaks at 163.7 and 158.4 eV correspond to the  $4f_{5/2}$  and  $4f_{7/2}$  levels of  $\text{Bi}^{3+}$ , (c) I<sup>-</sup>, the peaks at 630.7 and 619.2 eV correspond to the I  $3d_{3/2}$  and I  $3d_{5/2}$  levels, (d) Cl<sup>-</sup>, the peaks at 199.4 and 197.9 eV correspond to the  $2p_{1/2}$  and  $2p_{3/2}$  levels of Cl<sup>-</sup>.

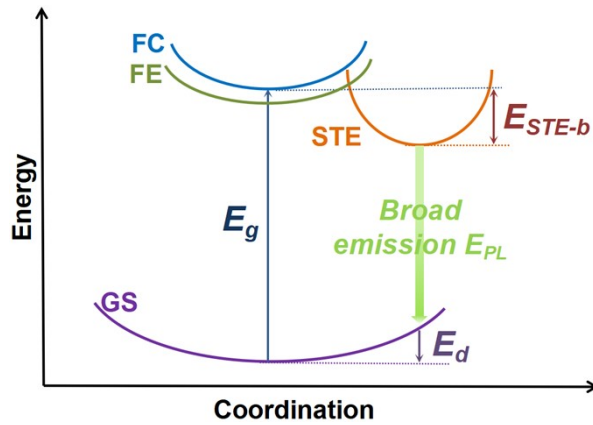

**Figure S3.** Schematic illustrations of the energy level structure in the STE. Ground state (GS), free carrier state (FC), free exciton state (FE), self-trapped exciton state (STE), bandgap energy ( $E_g$ ), emission energy ( $E_{PL}$ ), exciton binding energy of the STE ( $E_{STE-b}$ ), lattice deformation energy ( $E_d$ ).

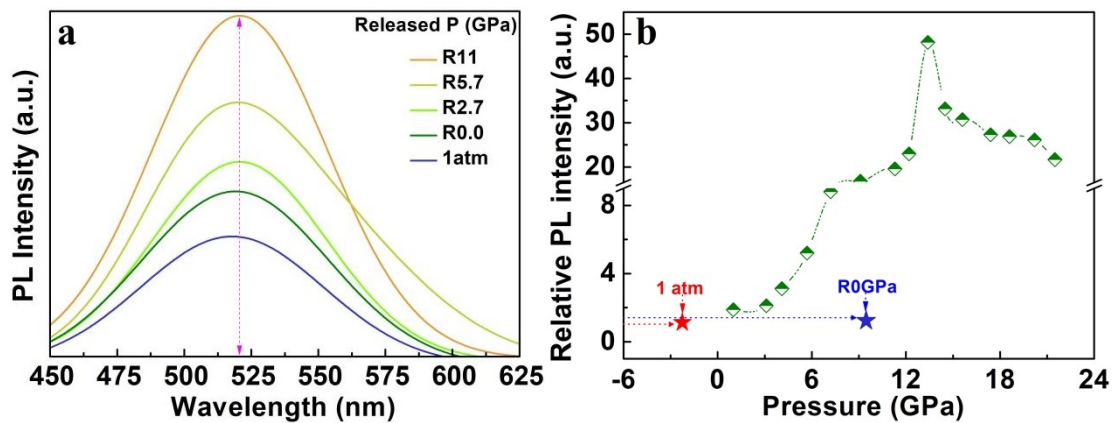

**Figure S4.** (a) PL emission spectra of  $\text{Cs}_3\text{Bi}_2\text{I}_6\text{Cl}_3$  NCs under decompression and atmospheric condition for comparison. (b) Relative PL intensity of  $\text{Cs}_3\text{Bi}_2\text{I}_6\text{Cl}_3$  NCs as a function of pressure. "R" represents PL emission spectra collected on pressure release.

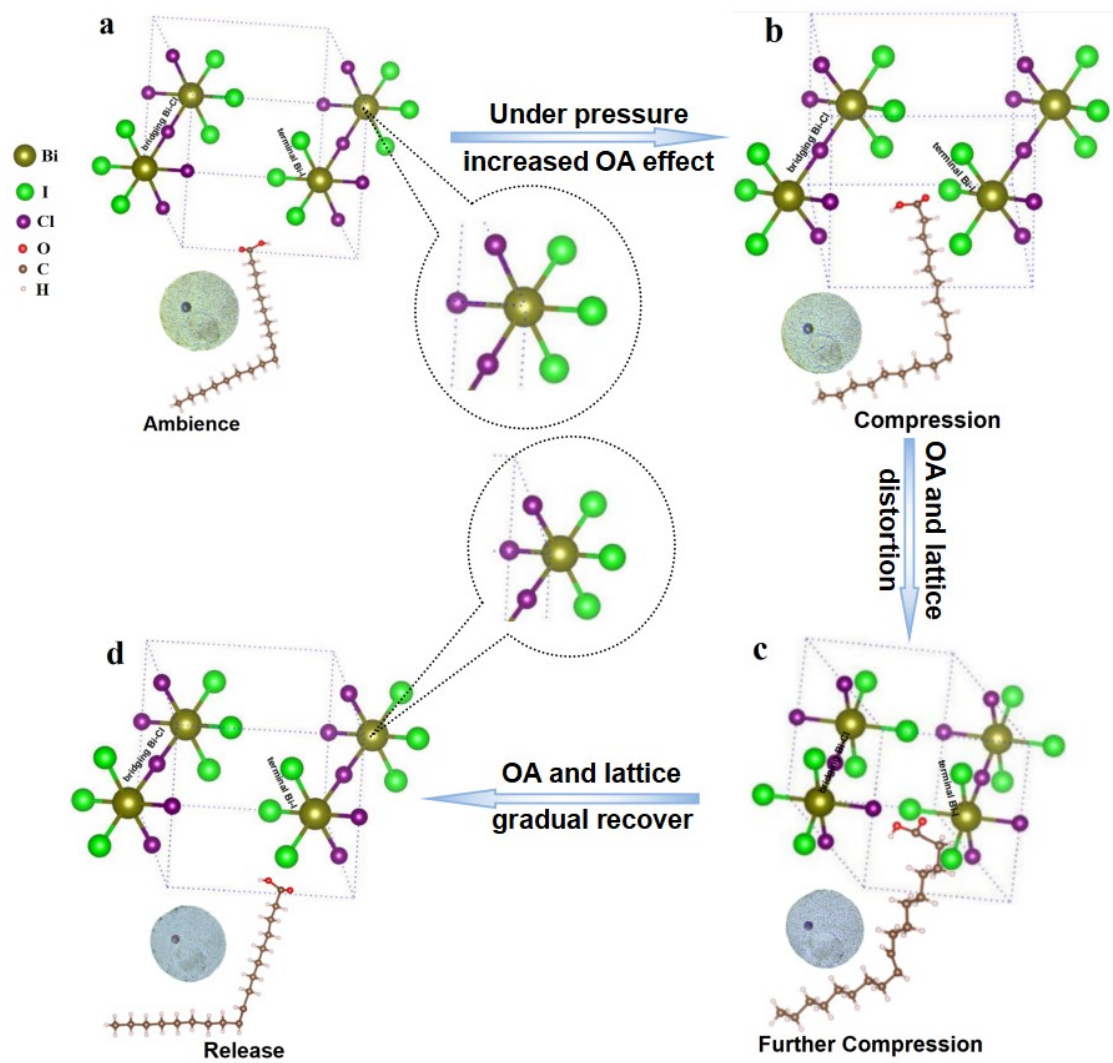

**Figure S5.** Schematic models of inorganic framework associated with Bi-Cl, Bi-I bonds and  $[\text{Bi}_3\text{Cl}_3]^{3-}$  unit; the brown chain represents the OA molecule. The insets showed high pressure optical micrographs of  $\text{Cs}_3\text{Bi}_2\text{I}_6\text{Cl}_3$  NCs in DAC.

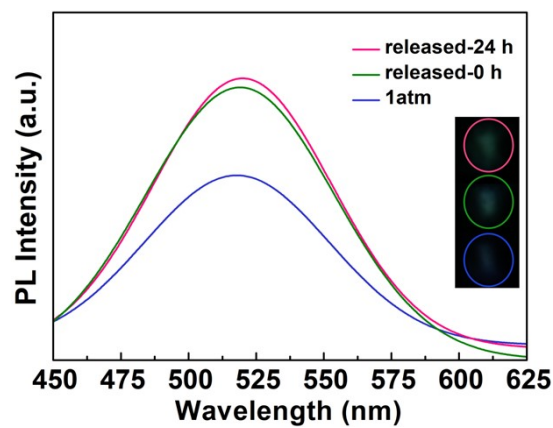

**Figure S6.** Time-dependent PL spectra of  $\text{Cs}_3\text{Bi}_2\text{I}_6\text{Cl}_3$  NCs at 1 atm, complete pressure release, and pressure release with maintaining 24 h. Insets showed the corresponding PL micrographs.

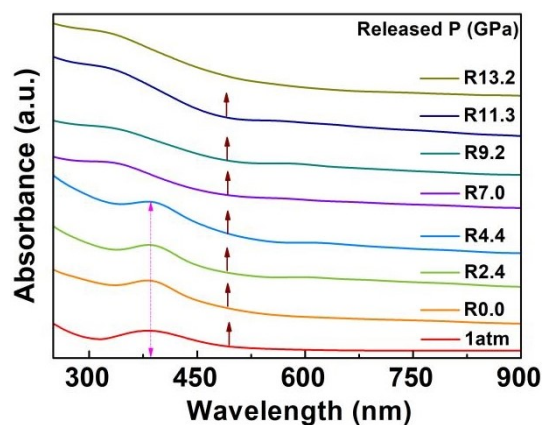

**Figure S7.** UV-vis absorption spectra of  $\text{Cs}_3\text{Bi}_2\text{I}_6\text{Cl}_3$  NCs under decompression and ambient conditions for comparison. “R” represents absorption spectra collected on pressure release.

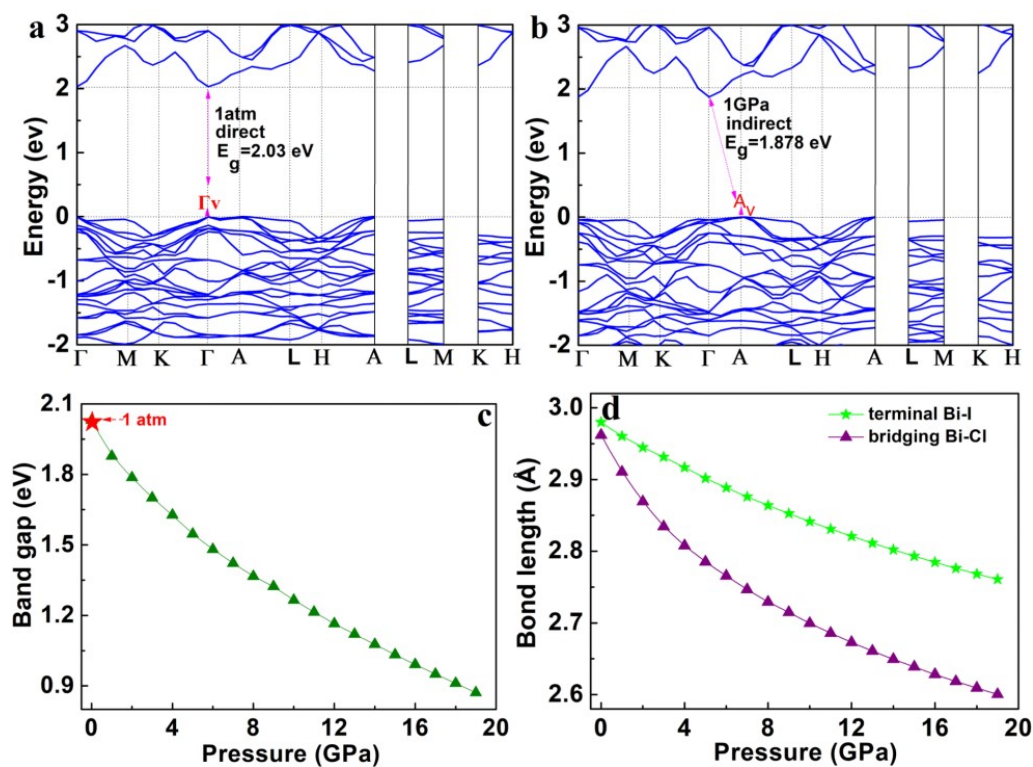

**Figure S8.** Calculated electronic band structure of  $\text{Cs}_3\text{Bi}_2\text{I}_6\text{Cl}_3$  at ambient conditions (a) and 1 GPa (b), Calculated pressure-driven band gap (c) and bonds length evolution (d).

**Table S1.** Comparison of Raman Peaks of Cs<sub>3</sub>Bi<sub>2</sub>I<sub>9</sub>/Cs<sub>3</sub>Bi<sub>2</sub>I<sub>6</sub>Cl<sub>3</sub>.

|   | Sample                                                                | Terminal Bi-I stretch (cm <sup>-1</sup> ) | Bridge Bi-I stretch (cm <sup>-1</sup> ) | Bridge Bi-Cl stretch (cm <sup>-1</sup> ) | Ref       |
|---|-----------------------------------------------------------------------|-------------------------------------------|-----------------------------------------|------------------------------------------|-----------|
| 1 | Cs <sub>3</sub> Bi <sub>2</sub> I <sub>9</sub> powder                 | 146.6                                     | 104.5                                   | /                                        | [1]       |
|   |                                                                       | 127.2                                     | 90.0                                    | /                                        |           |
| 2 | Cs <sub>3</sub> Bi <sub>2</sub> I <sub>9</sub> powder                 | 147.8                                     | 105.8                                   | /                                        | [2]       |
|   |                                                                       | 128.0                                     | 91.2                                    | /                                        |           |
| 3 | Cs <sub>3</sub> Bi <sub>2</sub> I <sub>6</sub> Cl <sub>3</sub> powder | 154                                       | /                                       | /                                        | [3]       |
|   |                                                                       | 134                                       | /                                       | /                                        |           |
| 4 | Cs <sub>3</sub> Bi <sub>2</sub> I <sub>6</sub> Cl <sub>3</sub> NCs    | 142.7                                     | /                                       | 101.8                                    | [4]       |
|   |                                                                       | 125.5                                     | /                                       | /                                        |           |
| 5 | Cs <sub>3</sub> Bi <sub>2</sub> I <sub>6</sub> Cl <sub>3</sub> NCs    | /                                         | /                                       | 96.1                                     | This work |
|   |                                                                       | /                                         | /                                       | 70.6                                     |           |

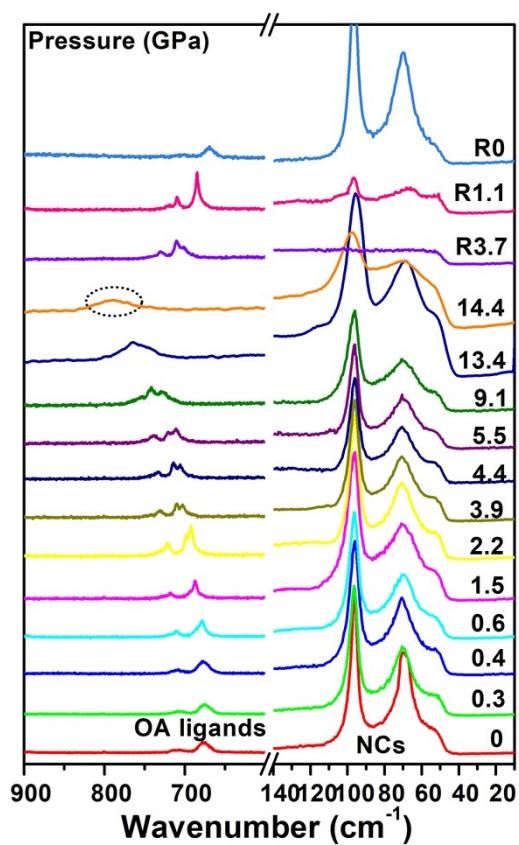**Figure S9.** OA ligands Raman modes in Cs<sub>3</sub>Bi<sub>2</sub>I<sub>6</sub>Cl<sub>3</sub> NCs under different pressure ranges.

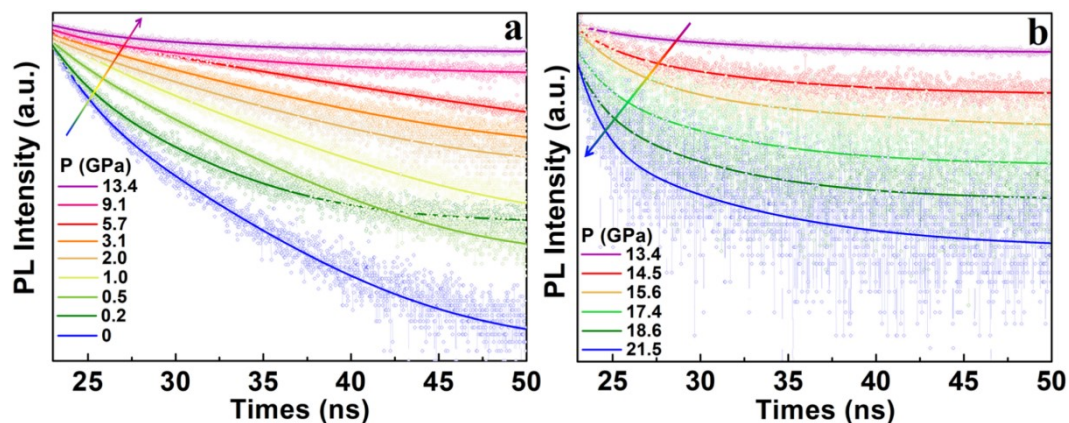

Figure S10. Time-resolved PL decay and fitting curves of Cs<sub>3</sub>Bi<sub>2</sub>I<sub>6</sub>Cl<sub>3</sub> NCs under different pressure ranges.

Table S2. The fitting results of Cs<sub>3</sub>Bi<sub>2</sub>I<sub>6</sub>Cl<sub>3</sub> NCs using a bi-exponential decay at different pressures.

| sample   | A <sub>1</sub> | τ <sub>1</sub> (ns) (ratio)(%) | A <sub>2</sub> | τ <sub>2</sub> (ns) (ratio)(%) | τ <sub>avg</sub> (ns) |
|----------|----------------|--------------------------------|----------------|--------------------------------|-----------------------|
| 1 atm    | 0.64           | 0.43 (78.7)                    | 0.01           | 7.43 (21.3)                    | 1.92                  |
| 0.5 GPa  | 0.56           | 0.76 (62.2)                    | 0.0298         | 8.67 (37.8)                    | 3.75                  |
| 1 GPa    | 0.65           | 0.79 (60.4)                    | 0.0353         | 9.55 (39.6)                    | 4.26                  |
| 2 GPa    | 0.78           | 0.93 (56.3)                    | 0.0831         | 8.55 (43.7)                    | 4.70                  |
| 3.1 GPa  | 0.80           | 1.27 (53.6)                    | 0.0938         | 9.39 (46.4)                    | 5.04                  |
| 4.1 GPa  | 0.93           | 1.38 (50.9)                    | 0.131          | 9.48 (49.1)                    | 5.36                  |
| 11.3 GPa | 1.40           | 1.61 (39.2)                    | 0.427          | 8.19 (60.8)                    | 5.61                  |
| 13.4 GPa | 1.51           | 1.67 (34.5)                    | 0.60           | 8.05 (65.5)                    | 5.85                  |
| 14.5 GPa | 1.62           | 1.24 (36.1)                    | 0.477          | 7.44 (63.9)                    | 5.20                  |
| 18.6 GPa | 0.71           | 0.91 (44.8)                    | 0.129          | 6.28 (55.2)                    | 3.90                  |
| 21.5 GPa | 0.76           | 0.87 (46.2)                    | 0.1361         | 5.65 (53.8)                    | 3.44                  |

## Reference

- [1] K. M. McCall, C. C. Stoumpos, S. S. Kostina, M. G. Kanatzidis, B. W. Wessels, Strong Electron–Phonon Coupling and Self Trapped Excitons in the Defect Halide Perovskites A<sub>3</sub>M<sub>2</sub>I<sub>9</sub> (A = Cs, Rb; M = Bi, Sb). *Chem. Mater.* **2017**, *29*, 4129-4145.
- [2] L. Zhang, C. Liu, L. Wang, C. Kai, B. Zou, Pressure-Induced Emission Enhancement, Band Gap Narrowing and Metallization of Halide Perovskite Cs<sub>3</sub>Bi<sub>2</sub>I<sub>9</sub>, *Angew. Chem. Int. Ed.* **2018**, *57*, 11213-11217.
- [3] K. M. McCall, C. C. Stoumpos, O. Y. Kontsevoi, G. C. B. Alexander, B. W. Wessels, M. G. Kanatzidis, From 0D Cs<sub>3</sub>Bi<sub>2</sub>I<sub>9</sub> to 2D Cs<sub>3</sub>Bi<sub>2</sub>I<sub>6</sub>Cl<sub>3</sub>: Dimensional Expansion Induces Direct Bandgap but Enhances Electron-Phonon Coupling, *Chem. Mater.* **2019**, *31*, 2644-2650.
- [4] K. Kundu, P. Acharyya, K. Maji, R. Sasmal, S. S. Agasti, K. Biswas, Synthesis and Localized Photoluminescence Blinking of Lead-Free 2D Nanostructures of Cs<sub>3</sub>Bi<sub>2</sub>I<sub>6</sub>Cl<sub>3</sub> Perovskite, *Angew. Chem. Int. Ed.* **2020**, *59*, 13093-13100.
